# Supplementary material
Source: publisher site journal article supplement (https://www.spandidos-publications.com/4048/downloadSupplementary)

Figure S1. Interaction of H89 or dbcAMP on melatonin. (A) Trajectory map. (B) Total moving distance. (C) Average speed. (D) Rearing times. (E) Number of squares crossed. (F) Percentage of time spent in the center. (G) Elevated plus maze at 30 days post-TBI of the experimental rats. (H) Percentage of open arm entries (%). (I) Percentage of time spent in open arms (%). (J) Total moving distance in EPM. n=12. dbcAMP, dibutyryl-cAMP; TBI, traumatic brain injury; Mel, melatonin; S, saline; ns, not significant.

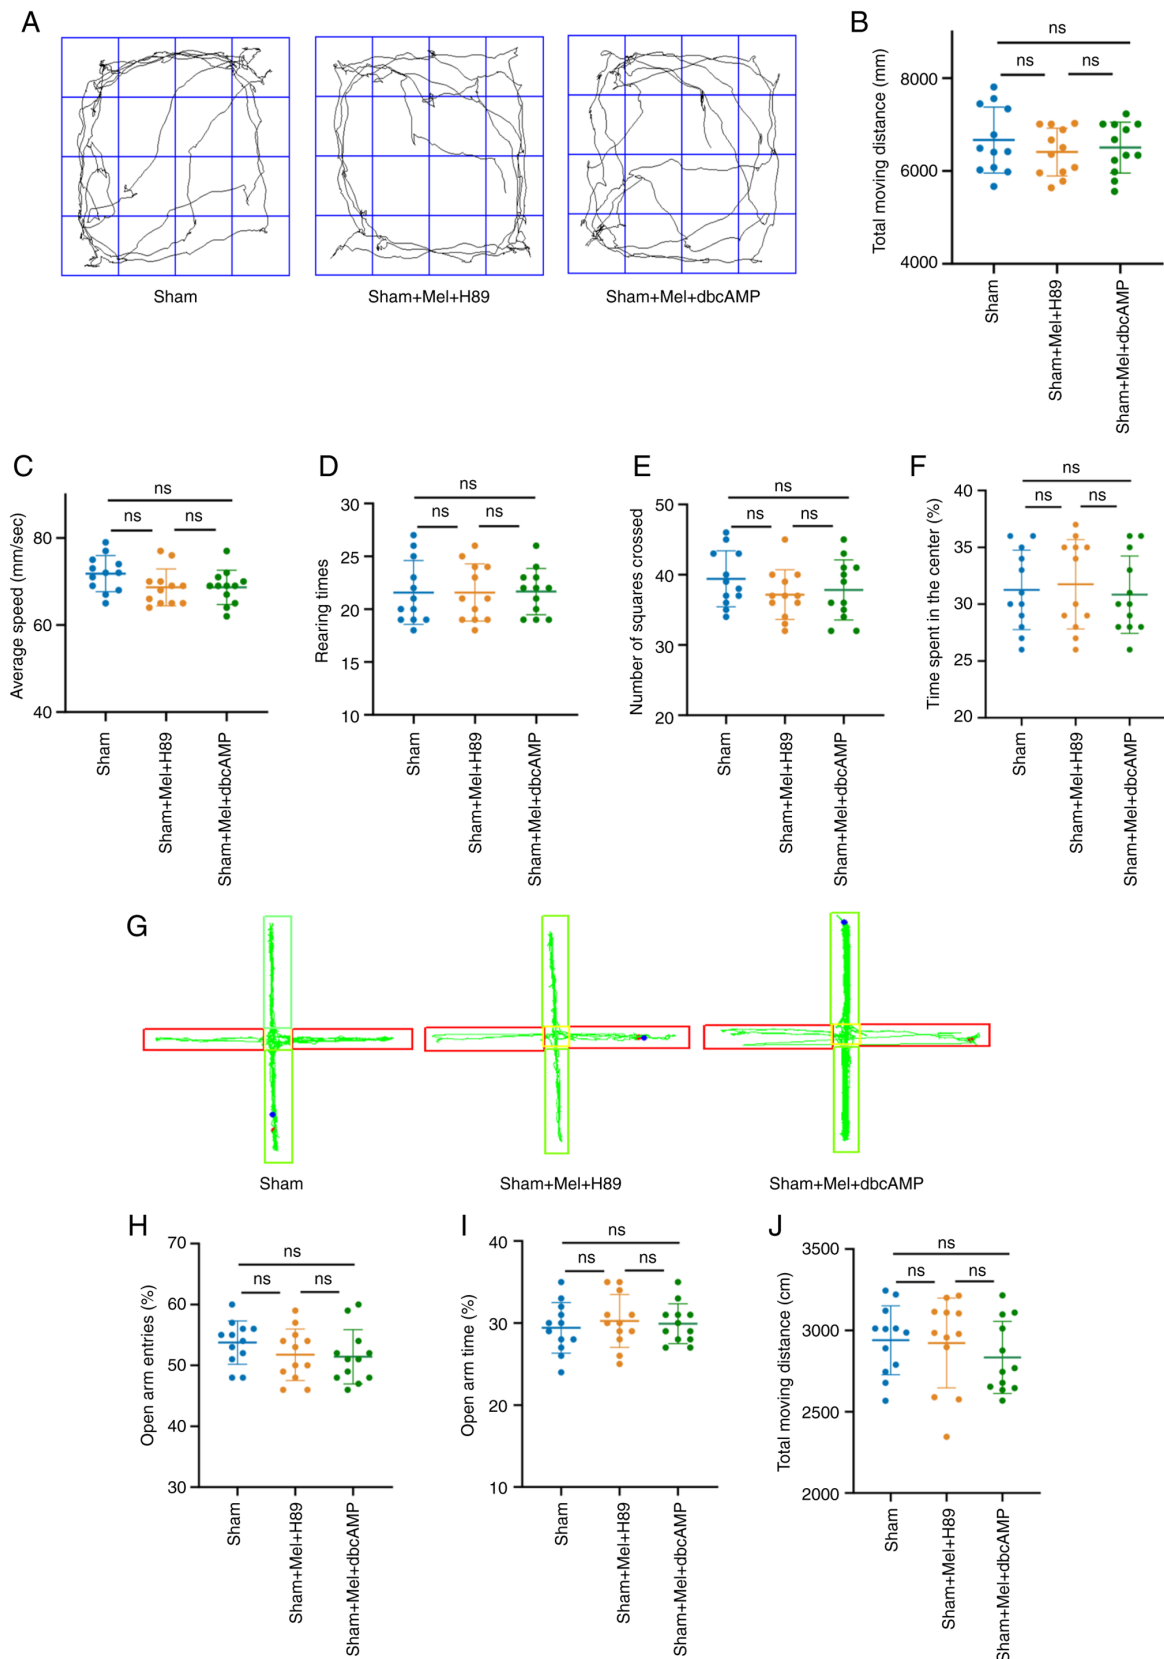

Figure S2. Brain anatomical map stained with DAPI. The corresponding brain anatomical map stained with DAPI (blue). The position indicated by the white box is the amygdala. DAPI, 4',6-diamidino-2-phenylindole.

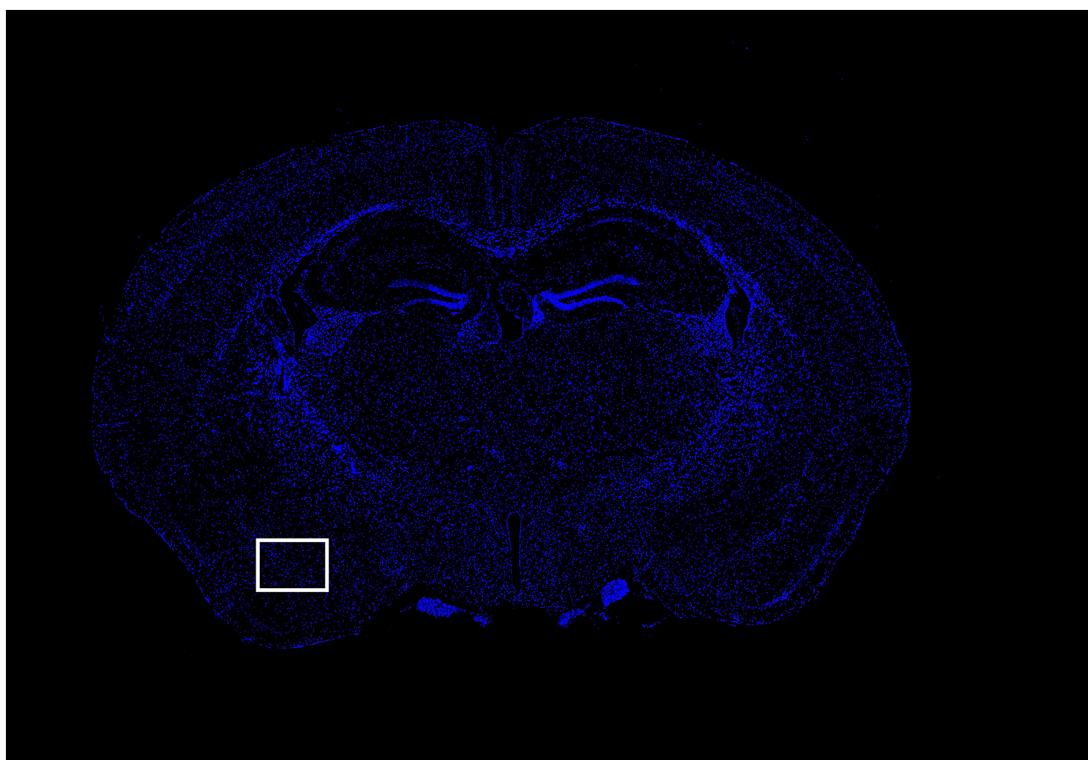

Supplement: Supplementary file 1 [file downloadSupplementary]
